# Supplementary material for: Fetal brain development in pregnancies complicated by gestational diabetes mellitus
Source: publisher site journal article supplement (doi:10.1515/jpm-2023-0456), 2024-01-17
Supplement: Supplementary file 1 [file j_jpm-2023-0456_suppl_001.docx]

**Supplemental Figure** **1**. Corpus callosum and cerebellar vermis depth normalized for head circumference (HC) in control fetuses and in fetuses of gestational diabetes mellitus (GDM) mothers divided according to treatment followed. Dots represent individual values, Lines show median and interquartile range.

**Supplemental Figure** **2**. Sylvian fissure, parieto-occipital fissure and calcarine fissure lengths normalized for head circumference values (HC) in control fetuses and in fetuses of gestational diabetes mellitus (GDM) mothers divided according to treatment followed. Dots represent individual values, Lines show median and interquartile range.
